# Supplementary material for: Upside-down in volcanic ash: crown reconstruction of the early Permian seed fern Medullosa stellata with attached foliated fronds
Source: PeerJ. 2022 Mar 22;10:e13051. doi: 10.7717/peerj.13051 (PMC8953532; doi:10.7717/peerj.13051)
Supplement: Supplemental Information 2 [file peerj-10-13051-s002.xlsx]

## Sheet: stem
		diameter (mm)								central accessory strands				height (mm)	height (mm)	fronds attached	parenchyma portion	cell size in µm
		stem (whole)			central parenchyma			vascular segment	cortex	number	diameter (mm)			stem segment	consecutive	(außen/Markraum)	%	vertical			Radial			Zellwanddicke			Lumen area
		Hor.	Vert.	MW	Hor.	Vert.	MW	Dicke (MW)	Dicke (MW)		Hor.	Vert.	MW		0			MW	Min	Max	MW	Min	Max	MW	Min	Max	in %
	01a_II	115	96	105.5	92	75	83.5	9.5	-	-	-	-	-	160	160		-	-	-	-	-	-	-	-	-	-	-
	01b_I	130	100	115	88	74	81	9	4.14	77	2.47143	1.8	2.13571	20	165		-	-	-	-	-	-	-	-	-	-	-
	01b_II	123	113	118	84	75	79.5	10	7	78	2.01818	1.58182	1.8	-	185		-	-	-	-	-	-	-	-	-	-	-
	01c/f/g_I	125	120	122.5	85	74	79.5	8.8	4.4	77	2.24286	1.7	1.97143	75	190		-	-	-	-	-	-	-	-	-	-	-
	01c/f/g_II	115	95	105	74	64	69	9.33333	5.175	84	2.2375	1.7375	1.9875	-	265		-	-	-	-	-	-	-	-	-	-	-
	01d_I	108	85	96.5	77	62	69.5	10.8333	4.7	83	2.39091	1.77273	2.08182	22	270		-	-	-	-	-	-	-	-	-	-	-
	01d_II	107	88	97.5	75	53	64	10.4	4.52	82	2.27	1.64	1.955	-	292		-	39.5	20.5	50.4	71.6	54.5	113.1	44.3	26.8	68.6	13.4
	01e_I	108	95	101.5	75	58	66.5	10.6	4.6	82	2.25455	1.64545	1.95	14	297		-	37.9	7.1	68.3	73.7	31.9	106.7	52.3	22.1	80.4
	02a_I	115	90	102.5	86	59	72.5	11	-	-	-	-	-	230	311	13	-	-	-	-	-	-	-	-	-	-	-
	02a_II	-	-	-	-	-	-	-	-	-	-	-	-	-	541	-	-	-	-	-	-	-	-	-	-	-	-
	02b_I	105	85	95	76	63	69.5	8.6	4.7	78	1.63636	1.15455	1.39545	15	546		-	-	-	-	-	-	-	-	-	-	-
	02b_II	111	85	98	78	52	65	7.25	-	87	1.75556	1.14444	1.45	-	561		-	-	-	-	-	-	-	-	-	-	-
	02c_I	115	90	102.5	71	53	62	7.75	-	84	1.61818	1.18182	1.4	30	566		11.5	47.5	31.5	63	47.5	31.5	63	54.6	22.3	103.2
	02c_II	112	93	102.5	78	52	65	7.4	-	-	-	-	-	-	596		-	-	-	-	-	-	-	-	-	-	-
	average	114.538	95	104.769	79.9231	62.6154	71.2692	9.26667	4.90437	81.2	2.08955	1.53583	1.81269	70.75		13	11.5
	min	105	85	95	71	52	62	7.25	4.14	77	1.61818	1.14444	1.39545	14		13	11.5
	max	130	120	122.5	92	75	83.5	11	7	87	2.47143	1.8	2.13571	230		13	11.5

## Sheet: tracheids
	01d_II	all values in µm or µm2					01e_I						02c_I
	surface	diameter	circumference	diameter radial	diameter vertical	cell wall thickn.	surface	diameter	circumference	diameter radial	diameter vertical	cell wall thickn.	cell wall thickn.	lumen size	lumen diameter	ZD LB vert.	surface central vasc. strand	diameter	circumference
	1412.26	42.4	162.95	78.69	45.54	37.85	1928.55	49.55	167.33	73.87	36.8	48.07	74.96	61.78	56.13	33.74	2846.66	60.2	201.81
	2513.71	56.57	202.83	88.4	45.31	48.17	2825.99	59.98	202.82	66.56	55.18	41.04	48.17	58.35	81.89	51.52	2830.35	60.03	193.18
	2049.5	51.08	199.19	85.85	30.87	37.82	3496.61	66.72	232.45	62.46	41.37	41	61.48	44.92	35.53	24.57	2918.7	60.96	204.05
	1747.53	47.17	172.53	90.45	35.46	49.64	4360.12	74.51	251.94	64.75	50.57	38.61	60.67	43.34	30.6	72.25	1581.26	44.87	145.96
	1505.06	43.78	151.83	77.14	60.45	43.34	5612.12	84.53	283.77	98.48	55.85	58.31	53.58	59.09	28.13	44.24	1629.09	45.54	148.56
	1960.19	49.96	166.49	84.8	50.57	37.82	4708.61	77.43	254.58	68.86	39.49	56.73	66.18	44.91	42.45	62.85	2181.75	52.71	183.92
	1357.45	41.57	151.58	78.68	49.93	40.18	3853.56	70.05	236.47	74.31	48.64	49.64	81.94	52	35.02	46.48	505.47	25.37	84.18
	2556.43	57.05	230.21	80.72	42.69	26.8	2710.77	58.75	203.14	91.2	19.7	52.03	63.83	49.64	28.66	36.57	4152.01	72.71	240.65
	2838.05	60.11	213.5	82.25	37.44	35.46	2839.33	60.13	201.74	83.43	39.41	65.4	70.91	37.83	22.74	27.22	2175.03	52.62	173.71
	2681.65	58.43	210.92	89.4	38.75	38.62	2623.3	57.79	188.07	87.53	39.54	53.6	51.22	45.7	38.32	21.18	2104.06	51.76	190.51
	1051.89	36.6	130.41	66.93	35.47	31.52	3070.94	62.53	201.34	76.59	44	51.21	40.19	60.8	50.32	16.78	2581.05	57.33	198.78
	818.51	32.28	111.17	60.29	21.67	35.46	4210.01	73.21	256.85	100.77	58.45	61.46	28.38	57.57	26.23	41.31	1596.99	45.09	160.72
	1313.46	40.89	164.61	64.88	39.41	59.1	3675.36	68.41	235.28	85.71	47.29	48.09	45.73	55.16	67.7	31.98	3060.86	62.43	211.63
	1292.5	40.57	174.87	60.28	44.78	48.85	3542.58	67.16	234.41	86.17	62.39	63.05	56.73	50.43	26.27	36.19	1898.39	49.16	162.28
	2034.93	50.9	175.91	58.24	32.18	39.4	3976.53	71.16	251.25	84.8	43.39	52.8	48.06	31.52	42.14	29.41	1747.25	47.17	159.14
	1211.21	39.27	151.85	68.46	17.09	53.6	3146.53	63.3	222.51	96.2	48.01	62.24	39.4	59.88	61.31	42.82	946.35	34.71	113.98
	1904.25	49.24	196.26	83.79	35.47	55.16	3536.27	67.1	233.44	106.71	41.14	51.27	40.18	57.52	63.43	39.44	1346.75	41.41	143.6
	3158.11	63.41	215.62	55.17	39.4	49.64	4272.26	73.75	252.68	78.43	68.31	49.66	44.91	54.39	26.12	41.7	2805.02	59.76	196.8
	1464.18	43.18	176.22	63.86	73.56	50.45	2283.95	53.93	195.7	87.55	46.63	51.22	47.28	53.58	34.1	24.25	6312.87	89.65	289.41
	1726.14	46.88	187.36	43.43	70.27	48.09	2618.2	57.74	204.92	90.27	38.09	52.03	54.37	59.88	41.15	76.28	1278.78	40.35	131.48
	1454.34	43.03	164.64	74.08	61.08	42.61	4467.08	75.42	258.9	75.23	42.03	47.44	45.71	59.09	67.65	29.18	1691.04	46.4	161.38
	2396.96	55.24	218.94	74.59	57.79	43.36	2834.38	60.07	218.64	75.23	60.42	76.43	41.77	63.03	47.82	81.56	1752.45	47.24	169.91
	2033.16	50.88	208.62	64.88	30.58	50.48	2880.62	60.56	219.71	82.52	32.84	49.66	43.34	37.82	56.26	65.37	2028.88	50.83	169.8
	1769.63	47.47	172.74	82.79	20.53	42.55	3214.66	63.98	237.49	90.27	51.95	60.69	65.4	39.4	35.16	36.38	1204.43	39.16	127.73
	1578.06	44.82	165.2	72.54	30.21	42.58	3021.2	62.02	207.73	85.71	47.28	31.53	40.18	39.4	44.21	31.84	990.6	35.51	115.5
	1777.9	47.58	197.65	69.99	27.42	48.85	3587.82	67.59	223.33	70.67	42.73	25.23	44.92	36.24	31.19	53.7	3662.85	68.29	226.38
	475.28	24.6	94.72	68.97	54.54	57.52	2574.34	57.25	205.97	71.12	28.9	46.59	47.28	40.21	73.35	20.6	1389.88	42.07	139.14
	706.46	29.99	108.98	38.88	48.6	49.64	4792.53	78.12	254.51	84.81	34.51	37.03	63.82	46.49	37.01	51.46	1448.68	42.95	138.87
	663.59	29.07	99.26	49.58	47.29	53.6	2787.3	59.57	195.97	66.57	28.67	56.73	78.79	38.61	79.08	28.9	986.21	35.44	121.12
	1202.07	39.12	162.38	86.4	32.86	40.25	2626.72	57.83	197.34	62.46	60.42	65.44	64.61	35.46	32.17	48.81	1426.5	42.62	141.08
	1767.82	47.44	160.88	84.65	40.74	57.54	3026.27	62.07	220.19	82.52	35.47	40.18	55.16	43.34	88.96	37.9	879.07	33.46	123.53
	1312.97	40.89	161.91	76.63	29.56	54.42	2556.52	57.05	186.07	70.21	38.09	45.73	43.34	38.61	54.14	41.73	547.46	26.4	87.8
	2460.39	55.97	195.08	76.62	38.09	54.37	3443.51	66.21	215.94	58.82	37.44	52.03	34.68	37.03	63.86	26.17	1561.82	44.59	149.48
	936.82	34.54	147.79	79.08	51.88	36.25	3481.7	66.58	220.91	73.87	32.83	45.71	45.7	37.82	46.46	36.04	1008.17	35.83	117.31
	1993.35	50.38	180.17	91.34	58.45	60.67	2203.03	52.96	182.55	68.39	22.37	55.18	58.39	37.82	27.76	29.7	829.63	32.5	106.97
	884.63	33.56	152.25	76.62	34.83	40.19	3040.51	62.22	210.96	69.76	65.03	38.62	33.88	41.76	17.37	45.9	906.89	33.98	113.36
	2040.53	50.97	205.26	83.38	27.59	43.34	3222.83	64.06	211.9	62.92	32.18	22.06	63.84	37.82	71.17	34.04	781.76	31.55	104.87
	1020.68	36.05	146.93	57.01	55.82	44.15	2986.29	61.66	206.63	74.77	51.24	54.37	40.18	43.34	35.41	26.46	965.25	35.06	123.84
	1990.57	50.34	187.25	70.49	42.03	42.55	3919.64	70.64	248.53	84.81	33.49	55.24	44.91	44.92	72.76	20.92	2772.83	59.42	206.37
	1672.88	46.15	183.97	85.1	23.65	45.7	3485.37	66.62	236.67	80.26	36.12	42.55	56.73	54.37	41.36	23.92	2387.08	55.13	189.75
	1006.36	35.8	134.21	98.34	60.42	43.34	2428.64	55.61	214.17	79.87	49.26	53.6	60.69	48.85	71.41	16.69	1488.73	43.54	145.26
	1484.25	43.47	196.54	87.02	32.18	48.86	2713.25	58.78	217.94	88.11	46.63	51.24	56.73	40.97	46.99	25.28	2675.08	58.36	192.18
	652.19	28.82	110.14	70.9	43.34	36.25	3224.54	64.08	223.39	87.86	49.25	55.94	60.67	40.97	55.88	10	2148.17	52.3	179.74
	1455.45	43.05	158.57	85.09	47.28	40.97	2163.93	52.49	206.29	79.08	51.23	49.64	48.86	43.34	58.3	21.67	1647.15	45.8	157.03
	1827.57	48.24	189.33	73.74	25.64	45.02	2633.74	57.91	216.71	67.16	43.39	49.64	46.49	42.58	49.57	15.54	1472.34	43.3	145.87
	2206.61	53.01	199.79	69.01	21.01	39.4	2945.75	61.24	218.97	91.14	56.48	49.66	48.85	40.18	36.67	18.22	1463.68	43.17	140.41
	2529.34	56.75	190.35	58.73	26.96	33.92	1275.64	40.3	135.79	90.27	43.36	61.46	53.58	48.86	52.47	14.58	1872.55	48.83	158.95
	2973.91	61.53	209.89	64.31	34.8	40.98	1626.59	45.51	183.05	53.93	49.27	61.46	57.52	40.97	39.42	51.64	1389.68	42.06	147.65
	2835.02	60.08	199.03	71.87	48.6	41	2527.57	56.73	207.88	67.86	49.65	61.54	48.06	44.12	91.94	30.05	1994.84	50.4	168.28
	3119.33	63.02	217.14	69.96	47.94	44.92	2260.85	53.65	194.54	45.59	22.94	38.64	72.49	44.91	79	59	2009.79	50.59	166.25
	3696.79	68.61	237.73	59.17	46.63	38.62	2075.48	51.41	176.15	65.2	31.53	46.55	70.91	59.09	72.83	39.12	1911.94	49.34	159.82
	3094.26	62.77	207.97	51.43	53.21	51.21	2517.21	56.61	188.82	51.52	41.38	34.67	103.23	44.12	44.3	56.08	2782.83	59.52	194.32
	2577.47	57.29	194.11	70.86	44	34.67	3029.08	62.1	208.26	31.93	7.07	48.07	53.58	47.3	48.29	33.21	1502.42	43.74	145.64
	2846.6	60.2	200.4	61.74	17.07	46.49	944.85	34.68	110.86	72.45	41.39	51.22	45.7	45.7	30.89	41.3	1919.04	49.43	160.92
	2876.44	60.52	206.62	63.78	17.84	49.69	1295.24	40.61	135.57	56.54	49.26	52.01	59.9	52.8	52.82	29.59	1209.22	39.24	132.08
	2131.7	52.1	190.99	84.56	21.68	39.47	2078.68	51.45	175.42	57.54	43.36	44.24	51.21	52.8	37.62	65.59	1714.31	46.72	157.29
	2578.91	57.3	190.92	73.74	17.07	41.79	2660.18	58.2	210.41	60.74	42.69	35.46	32.31	50.43	38.91	56.63	2207.77	53.02	183.2
	1663.16	46.02	152.84	69.04	39.95	44.13	2759.1	59.27	198.93	56.72	29.95	38.68	33.09	49.24	26.51	69.12	2521.17	56.66	192.07
	3696.05	68.6	232.28	79.54	25.98	42.58	2073.27	51.38	194.28	80.54	21.27	41.77	47.27	55.18	27.1	41.17	2064.34	51.27	170.25
	1932.73	49.61	197.6	82.82	14.46	38.62	1484.15	43.47	150.81	69.34	35.52	44.94	44.03	47.94	27.05	48.12	2924.92	61.03	206.59
	1939.74	49.7	187.91	85.44	48.6	35.46	1298.03	40.65	139.29	69.76	29.56	46.49	64.34	61.06	30.33	39.32	2013.45	50.63	186.9
	2233.16	53.32	180.1	69.7	48.6	44.91	1719.84	46.79	170.14	91.18	33.72	52.03	78.15	57.81	20.96	48.87	2928.35	61.06	194.24
	3228.31	64.11	210.99	67.7	19.71	46.51	1069.1	36.89	147.76	79.94	49.27	43.34	52.54	51.21	40.63	33.32	1723.9	46.85	152.91
	1849.95	48.53	158.91	95.28	63.06	48.09	1301.42	40.71	167.12	79.91	15.76	46.49	61.06	53.83	19.03	52.29	2545.75	56.93	189.45
	2364.28	54.87	195.37	76.16	49.27	47.27	763.84	31.19	142.8	76.61	45.32	48.06	45.3	61.07	10.59	39.09	1374.25	41.83	141.34
	2928.13	61.06	204.39	66.31	17.74	43.34	1273.68	40.27	173.88	72.05	25.61	46.49	59.09	48.6	16.11	58.53	1076.66	37.02	124.03
	3192.68	63.76	228.69	61.06	20.45	47.27	1133.6	37.99	166.66	55.65	33.49	52.79	53.18	34.14	18.33	34.53	1643.53	45.74	146.99
	3121.08	63.04	216	58.02	28.9	48.85	2083.74	51.51	218.49	59.38	34.15	66.2	33.51	40.05	6.95	72.53	2670.59	58.31	191.27
	2082.6	51.49	170.45	66.24	31.21	43.34	2193.33	52.85	215.5	92.88	29.01	55.95	72.89	36.11	14.97	37.67	2553.66	57.02	185.01
	1402.93	42.26	145.51	67.32	52.54	50.43	2488.93	56.29	198.57	51.98	25.61	53.6	49.91	34.15	12.53	73.2	1298.55	40.66	141.75
	2155.37	52.39	178.02	71.17	44.02	37.82	4387.18	74.74	252.34	70.7	47.3	60.72	63.06	36.77	17.91	42.52	1841.62	48.42	164.56
	3194.36	63.77	220.73	58.57	57.85	40.97	2496.74	56.38	203.54	96.33	21.02	45.81	60.43	58.45	12.13	61.03	660.4	29	96.28
	1824.18	48.19	178.1	73.89	65.03	45.71	1254.98	39.97	174.3	61.55	36.78	63.83	71.57	43.99	28.74	41.09	660.98	29.01	99.34
	900.6	33.86	122.05	87.77	47.29	44.92	1059.93	36.74	137.07	81.15	28.27	66.19	55.15	57.77	16.78	80.53	628.18	28.28	91.64
	2299.23	54.11	185.13	75.72	26.28	54.37	696.65	29.78	130.96	53.81	33.36	59.18	57.79	51.87	42.21	41.69	700.46	29.86	95.11
	1528.23	44.11	171.4	74.5	24.38	55.94	1210.97	39.27	152.2	75.91	26.27	74.87	61.71	59.09	26.01	72.13	895.46	33.77	112.3
	2289.43	53.99	203.85	85.01	25.61	53.6	1283.03	40.42	142.34	75.19	36.14	62.26	64.34	48.59	42.65	28.7	993.03	35.56	119.04
	1472.38	43.3	162.46	70.06	30.89	43.34	1430.24	42.67	143.83	85.57	20.36	46.49	55.15	48.58	23.62	61.69	382.53	22.07	74.13
	2188.02	52.78	181.01	65.28	39.42	68.57	1566.38	44.66	180.21	79.28	21.68	50.52	43.53	55.85	49.69	37.59	205.14	16.16	52.62
	886.43	33.6	138.16	60.5	20.36	46.51	1959.91	49.95	176.59	66.51	47.29	34.67	68.13	55.81	27.03	54.22	167.82	14.62	49.61
	499.15	25.21	89.35	79.94	45.33	38.64	1930.92	49.58	173.3	51.11	29.56	46.49	60.53	54.83	30.7	42.74	180.61	15.16	48.69
	1611.74	45.3	164.38	61.84	50.02	30.73	3672.17	68.38	240.02	54.3	40.8	44.72	57.74	44.43	18.97	52.65	207.21	16.24	52.98
	1414.87	42.44	161.44	65.14	29.55	31.53	2954.52	61.33	208.72	75.46	30.87	58.39	47.27	52	22.5	32.74	1138.28	38.07	123.42
	2152.79	52.35	197.73	75.11	30.86	31.56	3343.27	65.24	230.94	86.68	40.72	41.34	66.18	52	12.38	49.56	1406.02	42.31	136.02
	572.43	27	101.36	67.34	46.2	40.19	2766.99	59.36	217.09	69.51	22.84	71.02	69.01	58.61	25.9	36.01	951.2	34.8	111.66
	985.33	35.42	129.47	63.68	26.27	39.4	3712.47	68.75	251.72	54.86	47.81	70.19	62.42	52	18.53	46.45	966.13	35.07	118.8
	1139.44	38.09	134.64	76.43	58.45	41.77	3554.13	67.27	235.3	81.18	15.76	60.72	44.44	43.5	31.95	34.24	516.72	25.65	88.58
	3027.86	62.09	210.26	81.94	36.17	42.55	2703.68	58.67	209.75	65.73	40.11	74.07	50.1	41.61	17.98	63.32	317.65	20.11	64.29
	2274.1	53.81	187.4	72.64	38.09	60.69	1273.74	40.27	142.97	73.06	19.06	59.88	38.77	43.59	20.66	46.83	870.87	33.3	110.19
	2348.38	54.68	186.41	70.13	41.46	41.77	895.74	33.77	153.05	67.78	39.1	72.49	72.21	53.19	13.76	40.51	651.68	28.81	92.5
	2469.68	56.08	200.47	52.8	49.27	36.32	1090.45	37.26	162.03	68.05	17.73	80.37	80.16	49.96	42.4	54.32	736.67	30.63	107.84
	2199.91	52.92	214.82	82.4	44.66	38.68	659.82	28.98	122.84	63.83	22.34	70.12	53.9	51.97	26.64	73.04	849.95	32.9	112.37
	1770.52	47.48	167.32	71.86	35.56	54.37	1629.29	45.55	176.33	68.51	31.52	73.31	55.18	39.39	21.68	37.5	637.15	28.48	91.94
	2121.48	51.97	175.89	69.41	51.22	33.1	1216.86	39.36	154.06	77.96	30.22	60.67	40.05	44.03	15.65	55.31	966.83	35.09	120.78
	1089.15	37.24	128.71	60.07	33.65	45.71	1071.82	36.94	158.31	64.75	17.19	44.91	61.72	37.43	37.92	32.1	1196.84	39.04	131.9
	603.54	27.72	108.38	52.01	49.91	43.34	1123.88	37.83	139.43	75.69	33.48	50.43	22.32	33.49	31.75	69.15	706.25	29.99	106.73
	1067.18	36.86	154.25	61.7	34.31	36.24	931.66	34.44	156.06	62.02	13.13		63.68	36.11	39.45	46.7	540.36	26.23	87.49
	1528.15	44.11	180.03	66.23	65.03	44.94							54.49	40.7	19.77	60.31	294.32	19.36	64.73
	831.29	32.53	143	63.86	44.66								44.65	44.66	45.99	28.96	362.65	21.49	70.37
	2551.17	56.99	187.97	61.5	26.09								57.12	44.65	21.1	70.66	3885.56	70.34	230.38
	972.28	35.18	142.08										55.15	48.6	32.07	36.01	2864.48	60.39	225.93
	715.05	30.17	122.37												19.35	49.36	1684.57	46.31	171.08
	802.87	31.97	150.66	71.6271	39.4388	44.2681	2529.53	55.3442	197.983	73.6575	37.8902	52.3066	54.593	47.4532	52.14	32.47	1081.43	37.11	135.25
	927.76	34.37	156.17	38.88	14.46	26.8	659.82	28.98	110.86	31.93	7.07	22.06	22.32	31.52	24.31	41.47	589.82	27.4	91.17
	1104.73	37.5	144.4	98.34	73.56	68.57	5612.12	84.53	283.77	106.71	68.31	80.37	103.23	63.03	68.09	69.91	928.16	34.38	110.21
	2826.19	59.99	206.73												26.34	48.06	871.05	33.3	110.69
	2639	57.97	206.43												42.05	31.47	284.14	19.02	62.54
	992.52	35.55	141.26												35.45	49.01	233.04	17.23	56.07
	951.94	34.81	166.8												30.13	35.52	460.82	24.22	82.11
	882.81	33.53	162.71												25.75	42.82	1225.02	39.49	133.57
	935.83	34.52	133.2												37.47	25.92	1100.34	37.43	138.46
	2429.57	55.62	197.74												23.44	49.94	1021.62	36.07	116.3
	1441.91	42.85	175.81												41.08	29.36	918.97	34.21	116.84
	2536.67	56.83	200.56		Grey cells always resemble average values!										24.8	47.72	1201.92	39.12	125.27
	962.77	35.01	149.53												39.84	22.85	1520.84	44	140.85
	1337.95	41.27	186.93												19.01	27.95	999.67	35.68	116.59
	1742.71	47.11	186.21												30.59	23.15	1124.26	37.83	126.1
	649.86	28.76	147.19												27.41	57.46	1058.51	36.71	118.73
	2412.75	55.43	199.72												33.9	35.61	275.37	18.72	60.94
	2244.22	53.45	189.09												16.47	40.43	284.59	19.04	60.9
	2289.03	53.99	190.01												34.89	29.46	291.74	19.27	76.97
	2137.49	52.17	178.17												20.9	36.63	355.04	21.26	68.81
	2425.49	55.57	180.17												56.42	25.57	442.85	23.75	77.46
	904.52	33.94	145.55
	1187.75	38.89	163.63												37.432	42.1606	1461.83	40.8812	137.198
	1891.37	49.07	184.77												6.95	10	167.82	14.62	48.69
	2749.84	59.17	220.3												91.94	81.56	6312.87	89.65	289.41
	748.67	30.87	120.05
	1118.18	37.73	145.55
	3333.72	65.15	237.84
	1997.89	50.44	180.4
	1608.27	45.25	165.95
	1602.65	45.17	172.21
	955.9	34.89	158.78
	2207.75	53.02	174.5
	2504.87	56.47	197.49
	1071.52	36.94	146.9
	1349.61	41.45	134.22
	1666.55	46.06	170.3
	813.3	32.18	150.85
	975.87	35.25	156.01
	1066.62	36.85	148.52
	1019.07	36.02	135.65
	2470.77	56.09	198.13
	586.65	27.33	111.71
	1300.25	40.69	171.83
	1052.18	36.6	166.32
	2470.49	56.08	187.66
	1614.76	45.34	203
	1784.49	46.5054	173.167

## Sheet: tracheid length
	central vascular segment (KH0196-01f)
	in cm
	1	6.77
	2	6.18
	3	8.69
	4	8.81
	5	8.48
	6	6.52
	7	6.17
	8	6.32
	9	8.37
	10	8.12
	11	5.83
	12	8.34
	Av	7.38333
	Min	5.83
	Max	8.81

## Sheet: parenchyma wood
	KH0196-02c_I
	Item	surface	type
	1	27383.8	ray parenchyma
	2	26775.4	ray parenchyma
	3	30392.3	ray parenchyma
	4	33232.3	ray parenchyma
	5	19581.2	ray parenchyma
	6	26013.9	ray parenchyma
	7	34908.2	ray parenchyma
	8	29532.7	ray parenchyma
	9	1.98607e+06	whole image
mean percentage: [(sum 1...8) / 9)] * 100 =			11.4709

## Sheet: metaxylem tracheids
	length of metaxylem tracheids (KH0196-01f)
	(µm)
	1	52.73
	2	106.8
	3	99.62
	4	155.22
	5	213.4
	6	198.41
	7	177.01
	8	254.29
		179
	mean	157.19
	St.Dev	62.7
	Minimum	52.73
	Maximum	254.29
